# Supplementary material for: Iron Single Atoms Anchored on Nitrogen-Doped Carbon Matrix/Nanotube Hybrid Supports for Excellent Oxygen Reduction Properties
Source: MDPI journal article supplement (doi:10.3390/nano12091593), 2022-05-07
Supplement: s1 [file s1]

# Iron Single Atoms Anchored on Nitrogen-Doped Carbon Matrix/Nanotube Hybrid Supports for Excellent Oxygen Reduction Properties

Yining Jia <sup>1</sup>, Chunjing Shi <sup>1</sup>, Wei Zhang <sup>1</sup>, Wei Xia <sup>2</sup>, Ming Hu <sup>1</sup>, Rong Huang <sup>1,3,\*</sup> and Ruijuan Qi <sup>1,\*</sup>

<sup>1</sup> Key Laboratory of Polar Materials and Devices (MOE), Department of Electronics Sciences, School of Physics and Electronic Science, East China Normal University, Shanghai 200062, China;

51191213010@stu.ecnu.edu.cn (Y.J.); chunjingshi620@163.com (C.S.); wzhang@ee.ecnu.edu.cn (W.Z.); mhu@phy.ecnu.edu.cn (M.H.)

<sup>2</sup> Shanghai Key Laboratory of Green Chemistry and Chemical Processes, School of Chemistry and Molecular Engineering, East China Normal University, Shanghai 200241, China; xiaweifriend@163.com

<sup>3</sup> Collaborative Innovation Center of Extreme Optics, Shanxi University, Taiyuan 030006, China

\* Correspondence: rhuang@ee.ecnu.edu.cn (R.H.); rjq@ee.ecnu.edu.cn (R.Q.)

**Citation:** Jia, Y.; Shi, C.; Zhang, W.; Xia, W.; Hu, M.; Huang, R.; Qi, R. Iron Single Atoms Anchored on Nitrogen-Doped Carbon Matrix/Nanotube Hybrid Supports for Excellent Oxygen Reduction Properties. *Nanomaterials* **2022**, *12*, 1593. <https://doi.org/10.3390/nano12091593>

Academic Editor: Maria E. Davila

Received: 22 March 2022

Accepted: 03 May 2022

Published: 07 May 2022

**Publisher's Note:** MDPI stays neutral with regard to jurisdictional claims in published maps and institutional affiliations.

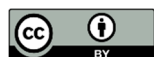

**Copyright:** © 2022 by the authors. Licensee MDPI, Basel, Switzerland. This article is an open access article distributed under the terms and conditions of the Creative Commons Attribution (CC BY) license (<https://creativecommons.org/licenses/by/4.0/>).

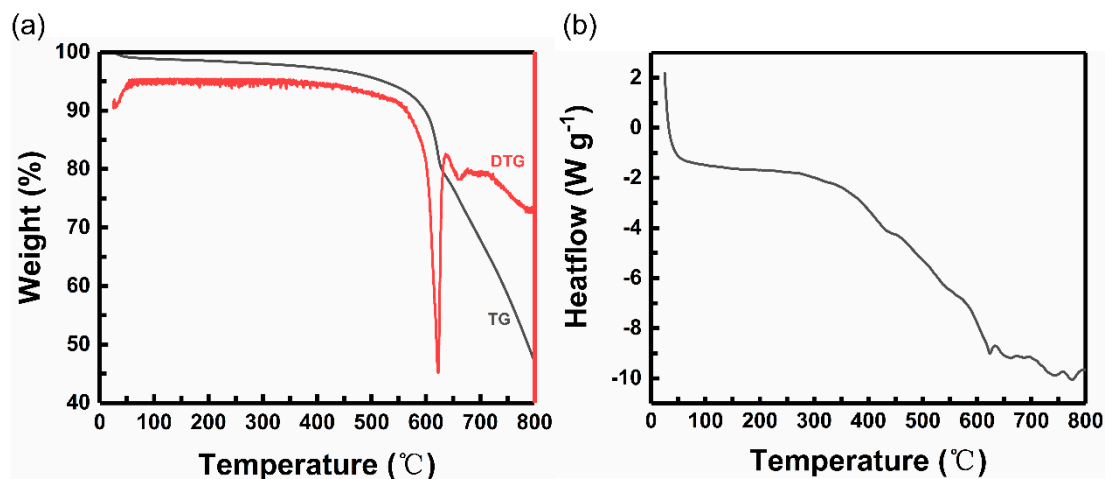

**Figure S1.** (a) TGA and (b) DSC curves of Fe(acac)<sub>3</sub>-0.1@ZIF-8. The weight loss was attributed to the decomposition of ZIF-8 and the release of Zn species. That is, the Zn nodes with a low boiling point of 907°C would evaporate at such high temperatures, leaving the N rich defects.

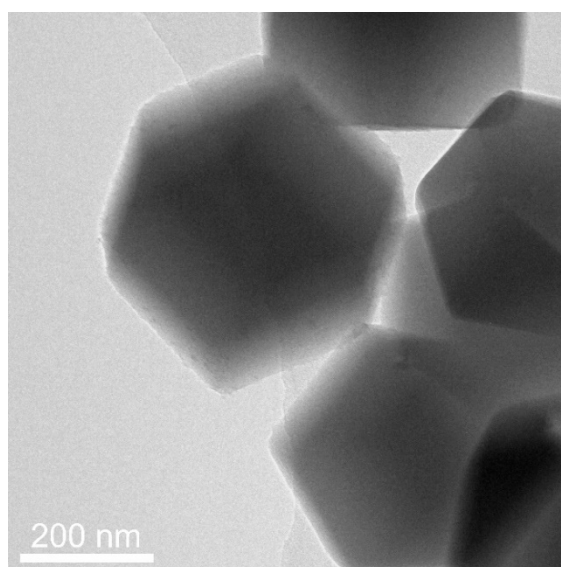

**Figure S2.** TEM image of Fe(acac)<sub>3</sub>-0.1@ZIF-8.

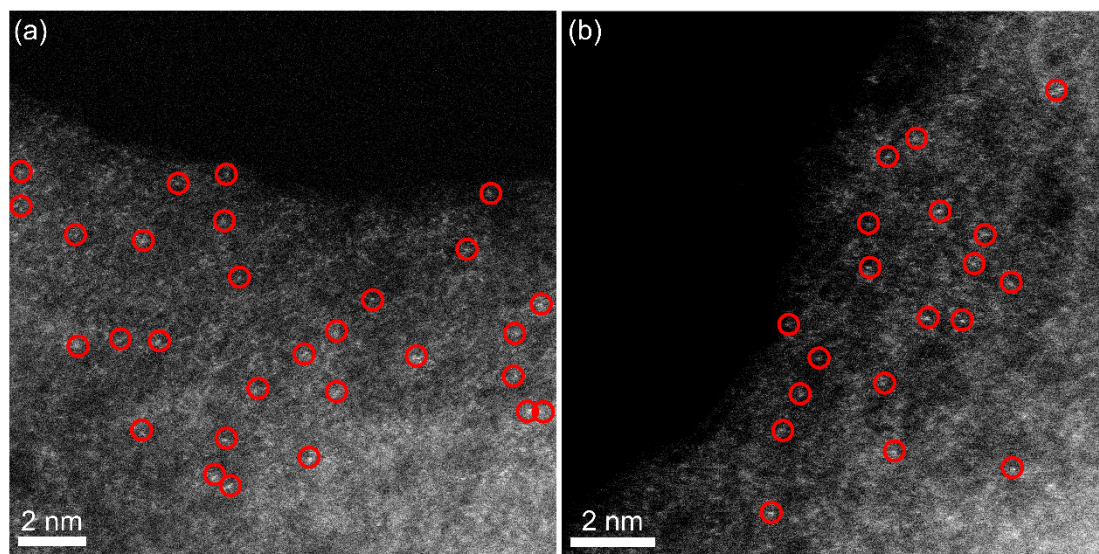

**Figure S3.** (a) and (b) are representative HAADF-STEM images of FeSA-NC/CNTs at different areas.

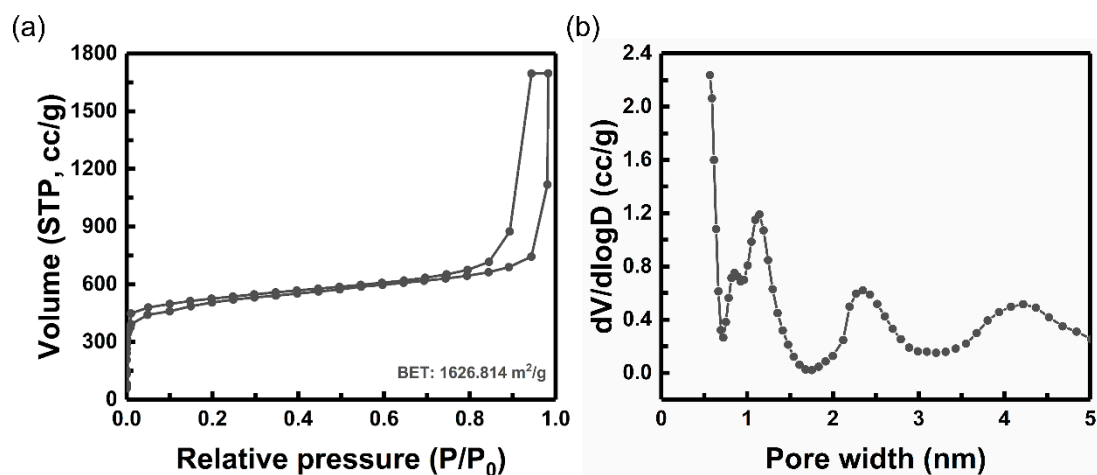

**Figure S4.** (a) N<sub>2</sub> sorption isotherms of FeSA-NC/CNTs. (b) Corresponding pore size distribution curve calculated using the DFT methods.

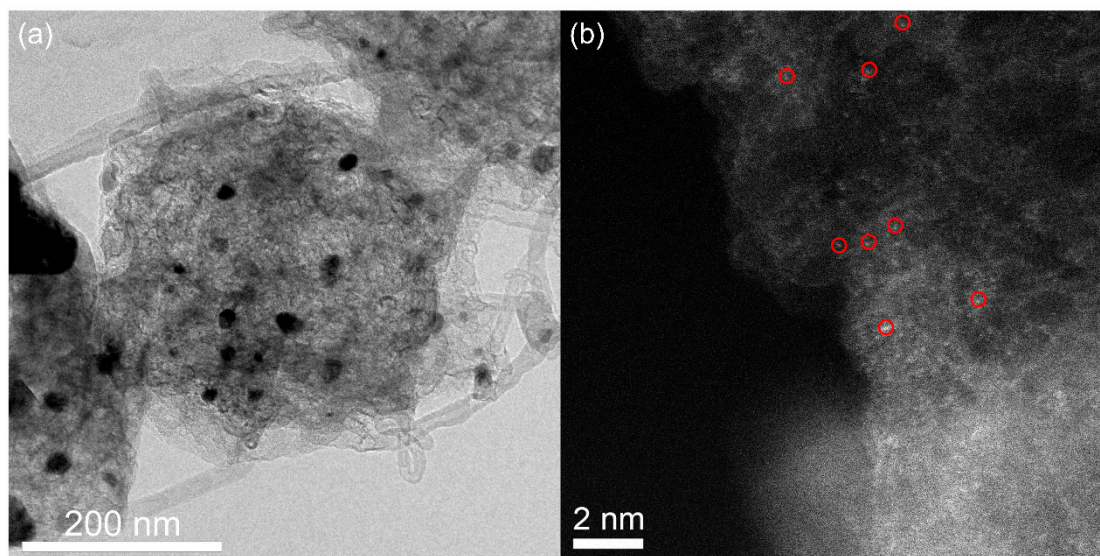

**Figure S5.** (a) TEM and (b) HAADF-STEM images of FeNP-NC/CNTs, where typical iron single atoms are marked by red circles.

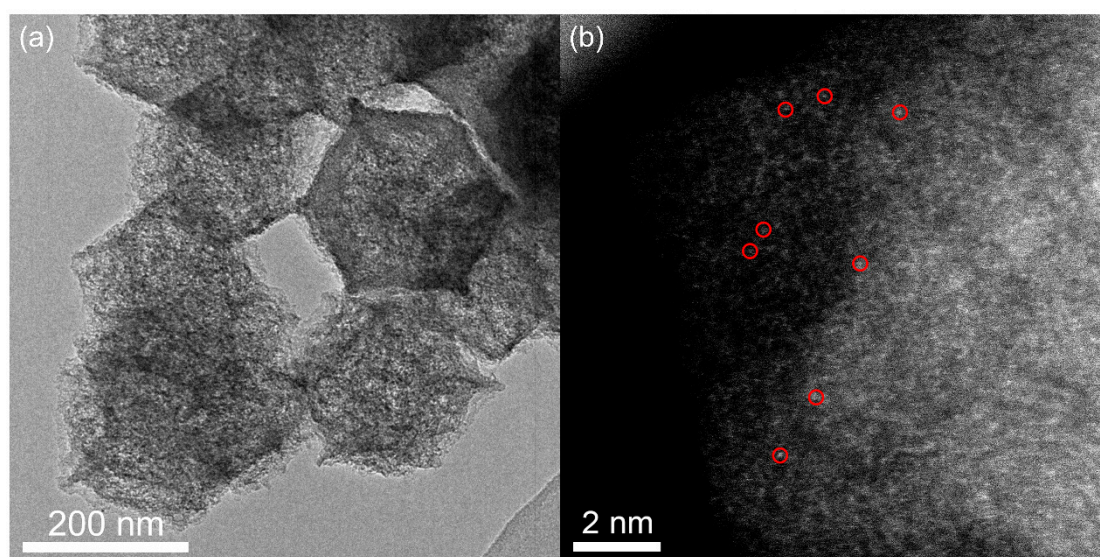

**Figure S6.** (a) TEM and (b) HAADF-STEM images of FeSA-NC, where typical iron single atoms are marked by red circles.



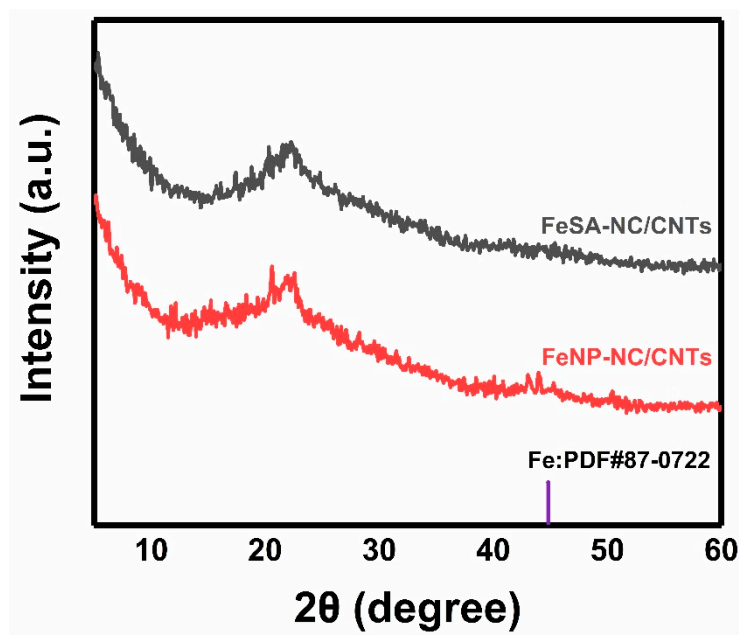

Figure S7. XRD patterns of FeSA-NC/CNTs and FeNP-NC/CNTs.

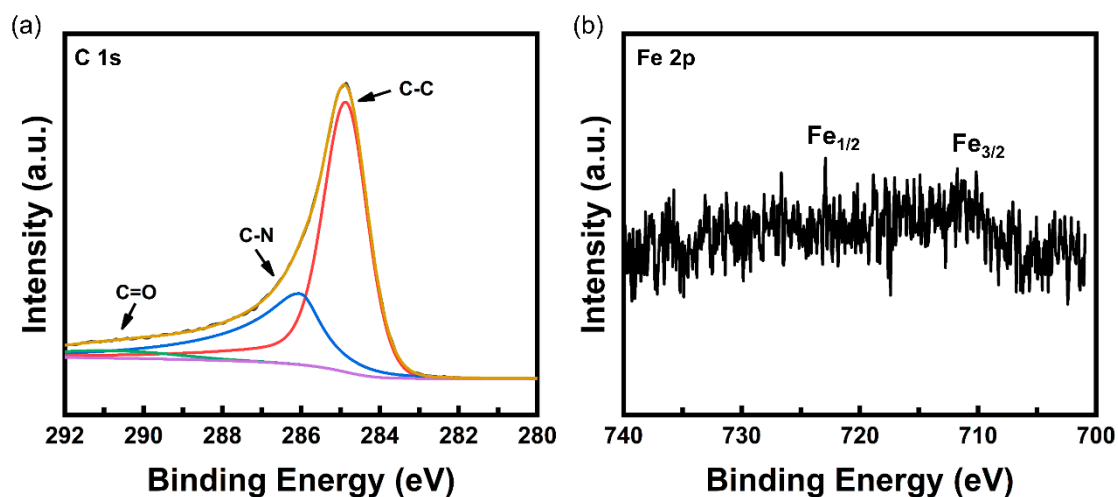

Figure S8. (a) High resolution XPS C 1s spectra of FeSA-NC/CNTs. (b) High resolution XPS Fe 2p spectra of FeSA-NC/CNTs.

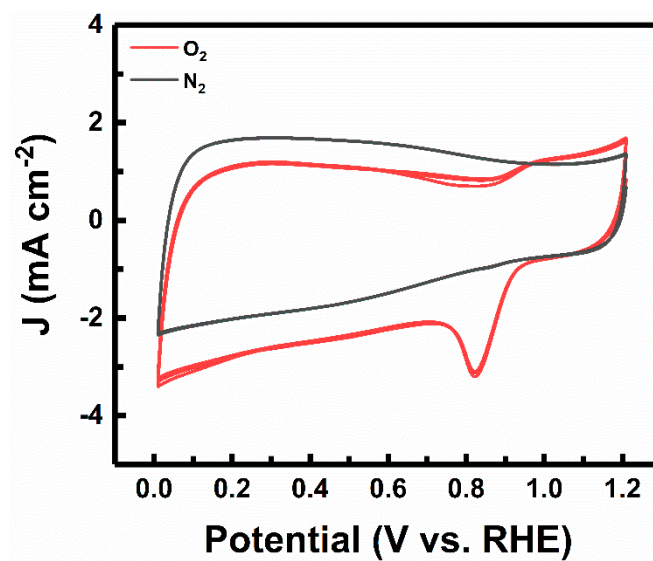

**Figure S9.** CV curves of FeSA-NC/CNTs in O<sub>2</sub>-saturated 0.1 M KOH with a sweep rate of 50 mV/s.

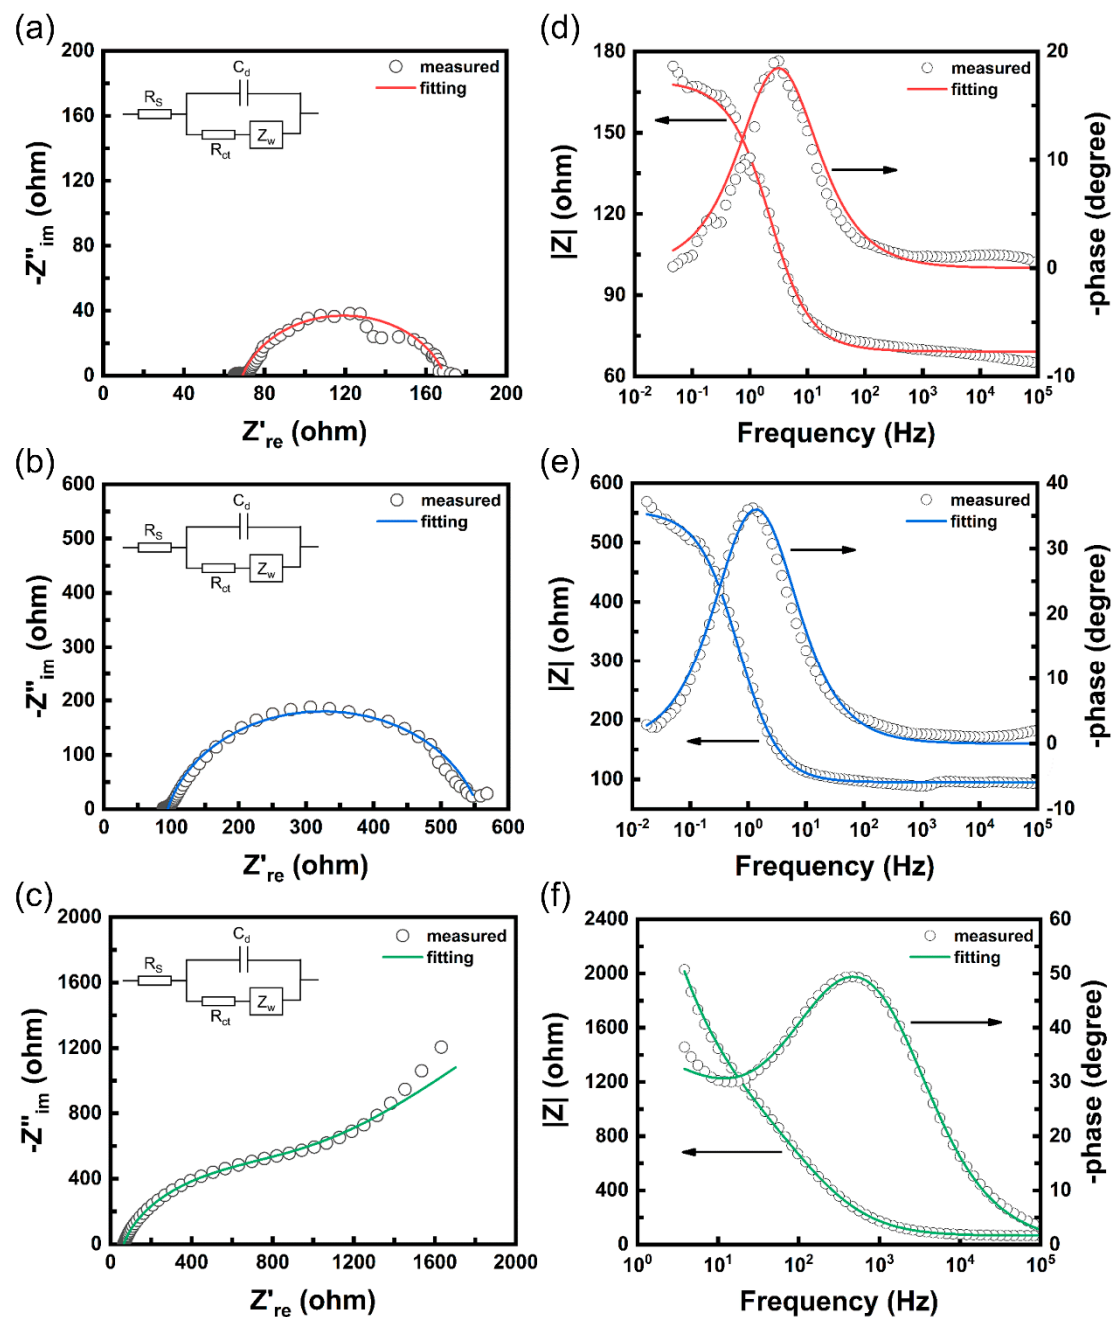

**Figure S10.** Nyquist plots of (a) FeSA-NC/CNTs, (b) FeSA-NC and (c) FeNP-NC/CNTs, where the inset is the equivalent circuit model for impedance spectra fitting. Bode plots of (d) FeSA-NC/CNTs, (e) FeSA-NC and (f) FeNP-NC/CNTs.

**Table S1.** Fitting results of Fe foil EXAFS

| Sample  | Shell | N | R    | $\sigma^2$ | R factor (%) |
|---------|-------|---|------|------------|--------------|
| Fe foil | Fe-Fe | 8 | 2.48 | 0.008      | 1.68         |
|         | Fe-Fe | 6 | 2.83 | 0.008      |              |

Fitting range:  $3.09 \leq k (\text{\AA}^{-1}) \leq 12.15$  and  $1.34 \leq R (\text{\AA}) \leq 3.00$

**Table S2.** Fitting results of sample-Fe EXAFS

| Sample       | Shell | N       | R    | $\sigma^2$ | R factor (%) |
|--------------|-------|---------|------|------------|--------------|
| FeSA-NC/CNTs | Fe-N  | 4.2±0.2 | 2.01 | 0.007      | 0.48         |

Fitting range: FeSA-NC/CNTs:  $2.71 \leq k (\text{\AA}^{-1}) \leq 8.98$  and  $1.00 \leq R (\text{\AA}) \leq 2.00$

**Table S3.** Comparison of ORR performance with some reported non-precious catalysts in 0.1 M KOH.

| Catalysts            | $E_{1/2}$ (V vs. RHE) | $E_{1/2}$ relative to Pt/C (mV vs. RHE) | $J_K$ at 0.85 V (mV cm <sup>-2</sup> ) | Tafel slope (mV dec <sup>-1</sup> ) | Stability                                            | Ref.      |
|----------------------|-----------------------|-----------------------------------------|----------------------------------------|-------------------------------------|------------------------------------------------------|-----------|
| FeSA-NC/CNTs         | 0.86                  | 14                                      | 39.3 (@0.8 V)                          | 74.4                                | 1 mV loss after 5000 cycles                          | This work |
| SA-Fe-NHPC           | 0.93                  | 80                                      | 6 (@0.7 V)                             | 57.2                                | 1 mV loss after 10000 cycles                         | [1]       |
| Fe SAs/N-C           | 0.91                  | -                                       | -                                      | 67                                  | no decay after 10000 cycles                          | [2]       |
| Fe/N-G-SAC           | 0.89                  | -                                       | 3.837 (@0.9 V)                         | 50                                  | 3 mV loss after 10000 cycles                         | [3]       |
| Fe SAC-MIL101-1000   | 0.94                  | 50                                      | 37.14 (@0.9 V)                         | 48.8                                | a current retention of 94.3% at 0.7 V after 40 000 s | [4]       |
| Fe-N <sub>x</sub> -C | 0.91                  | 90                                      | 14.7                                   | 69                                  | a current retention of 99% at 0.3 V                  | [5]       |



|                       |       |     |               |       |                                                  |      |
|-----------------------|-------|-----|---------------|-------|--------------------------------------------------|------|
|                       |       |     |               |       | after 15 h                                       |      |
| Fe-SA/Meso-C          | 0.926 | -   | 92.5          | 60.8  | 6 mV loss after 5000 cycles                      | [6]  |
| Fe <sub>SA</sub> /NSC | 0.91  | 40  | 19.83         | 55.9  | 3 mV loss after 5000 cycles                      | [7]  |
| Fe-SA/NCS             | 0.91  | 60  | 26.65         | 53.6  | a current retention of 95% after 20 h            | [8]  |
| Fe-ISAS/CN            | 0.861 | 21  | 5.74          | 78    | 4 mV loss after 5000 cycles                      | [9]  |
| Fe-N-C/N-OMC          | 0.93  | 70  | 87.4          | 75    | 5 mV loss after 5000 cycles                      | [10] |
| Co/S,N-C              | 0.84  | 0   | -             | 76    | no decay after 3000 cycles                       | [11] |
| Co-SAC/NC             | 0.884 | 28  | 3.48 (@0.9 V) | -     | a current retention of 90% after 30000 s         | [12] |
| S-Co/N/C              | 0.86  | -   | -             | -     | a current retention of 94.9% after 100 h         | [13] |
| Co-N/ZIF-2            | 0.861 | 42  | 26 (@0.8 V)   | 37.9  | a current retention of 90% at 0.861 V after 2 h  | [14] |
| Co-SAs@NHOP C         | 0.851 | 19  | -             | 51    | no decay after 5000 cycles                       | [15] |
| Mn-N-C                | 0.944 | -   | 96.96         | 64.24 | no decay after 5000 cycles                       | [16] |
| Ca-N, O/C             | 0.90  | 30  | -             | -     | a current retention of 83.2% at 0.7 V after 28 h | [17] |
| Re SAC                | 0.72  | -80 | -             | -     | a current retention of 80.3% at 0.5 V            | [18] |

---

after 80000 s

---

## Reference:

1. Chen, G.; Liu, P.; Liao, Z.; Sun, F.; He, Y.; Zhong, H.; Zhang, T.; Zschech, E.; Chen, M.; Wu, G. Zinc-mediated template synthesis of Fe-N-C electrocatalysts with densely accessible Fe-N<sub>x</sub> active sites for efficient oxygen reduction. *Advanced Materials* **2020**, *32*, 1907399.
2. Ge, X.; Su, G.; Che, W.; Yang, J.; Zhou, X.; Wang, Z.; Qu, Y.; Yao, T.; Liu, W.; Wu, Y. Atomic filtration by graphene oxide membranes to access atomically dispersed single atom catalysts. *ACS Catalysis* **2020**, *10*, 10468–10475.
3. Xiao, M.; Xing, Z.; Jin, Z.; Liu, C.; Ge, J.; Zhu, J.; Wang, Y.; Zhao, X.; Chen, Z. Preferentially engineering FeN<sub>4</sub> edge sites onto graphitic nanosheets for highly active and durable oxygen electrocatalysis in rechargeable Zn–air batteries. *Advanced Materials* **2020**, *32*, 2004900.
4. Xie, X.; Peng, L.; Yang, H.; Waterhouse, G.I.; Shang, L.; Zhang, T. MIL-101-Derived Mesoporous Carbon Supporting Highly Exposed Fe Single-Atom Sites as Efficient Oxygen Reduction Reaction Catalysts. *Advanced Materials* **2021**, *33*, 2101038.
5. Han, J.; Meng, X.; Lu, L.; Bian, J.; Li, Z.; Sun, C. Single-atom Fe-N<sub>x</sub>-C as an efficient electrocatalyst for zinc–air batteries. *Advanced Functional Materials* **2019**, *29*, 1808872.
6. Wang, X.; Zhu, H.; Yang, C.; Lu, J.; Zheng, L.; Liang, H.-P. Mesoporous carbon promoting the efficiency and stability of single atomic electrocatalysts for oxygen reduction reaction. *Carbon* **2022**, *191*, 393–402.
7. Liu, X.; Zhai, X.; Sheng, W.; Tu, J.; Zhao, Z.; Shi, Y.; Xu, C.; Ge, G.; Jia, X. Isolated single iron atoms anchored on a N, S-codoped hierarchically ordered porous carbon framework for highly efficient oxygen reduction. *Journal of Materials Chemistry A* **2021**, *9*, 10110–10119.
8. Wang, X.; Yang, C.; Wang, X.; Zhu, H.; Cao, L.; Chen, A.; Gu, L.; Zhang, Q.; Zheng, L.; Liang, H.-P. Green Synthesis of a Highly Efficient and Stable Single-Atom Iron Catalyst Anchored on Nitrogen-Doped Carbon Nanorods for the Oxygen Reduction Reaction. *ACS Sustainable Chemistry & Engineering* **2020**, *9*, 137–146.
9. Wei, S.; Wang, Y.; Chen, W.; Li, Z.; Cheong, W.-C.; Zhang, Q.; Gong, Y.; Gu, L.; Chen, C.; Wang, D. Atomically dispersed Fe atoms anchored on COF-derived N-doped carbon nanospheres as efficient multi-functional catalysts. *Chemical science* **2020**, *11*, 786–790.
10. Han, J.; Bao, H.; Wang, J.-Q.; Zheng, L.; Sun, S.; Wang, Z.L.; Sun, C. 3D N-doped ordered mesoporous carbon supported single-atom Fe-NC catalysts with superior performance for oxygen reduction reaction and zinc-air battery. *Applied Catalysis B: Environmental* **2021**, *280*, 119411.
11. Wang, Z.; Shang, N.; Wang, W.; Gao, S.; Zhang, S.; Gao, W.; Cheng, X.; Wang, C. Atomically dispersed Co anchored on S, N-riched carbon for efficient oxygen reduction and Zn-air battery. *Journal of Alloys and Compounds* **2022**, *899*, 163225.
12. Rao, P.; Luo, J.; Wu, D.; Li, J.; Chen, Q.; Deng, P.; Shen, Y.; Tian, X. Isolated Co Atoms

- Anchored on Defective Nitrogen-doped Carbon Graphene as Efficient Oxygen Reduction Reaction Electrocatalysts. *Energy & Environmental Materials*.
13. Sun, T.; Zang, W.; Yan, H.; Li, J.; Zhang, Z.; Bu, Y.; Chen, W.; Wang, J.; Lu, J.; Su, C. Engineering the coordination environment of single cobalt atoms for efficient oxygen reduction and hydrogen evolution reactions. *ACS Catalysis* **2021**, *11*, 4498–4509.
  14. Wu, H.; Wu, J.; Li, Y.; Li, W.; Zhai, J.; Jiang, Q.; Xu, X.; Gao, Y. Enhanced oxygen reduction with carbon-polyhedron-supported discrete cobalt-nitrogen sites for Zn-air batteries. *Chemical Engineering Journal* **2022**, *431*, 134084.
  15. Guo, Y.; Liu, F.; Feng, L.; Wang, X.; Zhang, X.; Liang, J. Single Co atoms anchored on nitrogen-doped hierarchically ordered porous carbon for selective hydrogenation of quinolines and efficient oxygen reduction. *Chemical Engineering Journal* **2022**, *429*, 132150.
  16. Kong, Z.; Liu, T.; Hou, K.; Guan, L. Atomically dispersed Mn-N<sub>4</sub> electrocatalyst with high oxygen reduction reaction catalytic activity from metal organic framework ZIF-8 by minimal water assisted mechanochemical synthesis. *Journal of Materials Chemistry A* **2022**.
  17. Lin, Z.; Huang, H.; Cheng, L.; Hu, W.; Xu, P.; Yang, Y.; Li, J.; Gao, F.; Yang, K.; Liu, S. Tuning the p-Orbital Electron Structure of s-Block Metal Ca Enables a High-Performance Electrocatalyst for Oxygen Reduction. *Advanced Materials* **2021**, *33*, 2107103.
  18. Zhang, X.; Shang, L.; Yang, Z.; Zhang, T. A Rhenium Single-Atom Catalyst for the Electrocatalytic Oxygen Reduction Reaction. *ChemPlusChem* **2021**, *86*, 1635–1639.
